# Supplementary material
Source: MDPI journal article supplement (https://www.mdpi.com/1424-2818/14/4/302)
Supplement: s1 [file s1]

## Supplementary Materials

# Similar Response of a Range Expanding Dragonfly to Low- and High-Elevation Predators

Rabah Zebsa <sup>1,2</sup>, Hayat Mahdjoub <sup>2</sup> and Rassim Khelifa <sup>2,3,4,\*</sup>

Rabah Zebsa<sup>1,2</sup>, Hayat Mahdjoub<sup>2</sup>, Rassim Khelifa<sup>2,3,4</sup>

<sup>1</sup> Laboratoire Biologie, Eau et Environnement (LBEE), Université 8 Mai 1945, Guelma 24000, Algeria;  
zebsarabah@gmail.com

<sup>2</sup> Department of Evolutionary Biology and Environmental Studies, University of Zurich, Winterthurerstrasse 190, CH-8057 Zurich, Switzerland; hayatmahdjoub@gmail.com

<sup>3</sup> Institute for Resources, Environment and Sustainability, University of British Columbia, Vancouver,  
429-2202 Main Mall, Vancouver, BC V6T 1Z4, Canada

<sup>4</sup> Department of Biological Sciences, Simon Fraser University, Burnaby, BC V5A 1S6, Canada

\* Correspondence: rassimkhelifa@gmail.com

## Supplementary tables

**Table S1.** Summary results of the linear mixed effects model regressing head width of *Sympetrum striolatum* against time, temperature and predation treatments.

|                           | <b>Estimate</b> | <b>Std.<br/>Error</b> | <b>df</b> | <b>t value</b> | <b>Pr(&gt; t )</b> |
|---------------------------|-----------------|-----------------------|-----------|----------------|--------------------|
| (Intercept)               | -7.838e+00      | 4.167e-01             | 1.046e+03 | -18.810        | < 2e-16            |
| time                      | 2.537e-02       | 1.220e-03             | 1.031e+03 | 20.805         | < 2e-16            |
| TreatmentHigh             | -1.900e+00      | 5.807e-01             | 1.037e+03 | -3.272         | 0.001105           |
| TreatmentLow              | -1.821e+00      | 6.013e-01             | 1.037e+03 | -3.028         | 0.002522           |
| Temp24                    | -5.555e+00      | 6.504e-01             | 1.057e+03 | -8.542         | < 2e-16            |
| time:TreatmentHigh        | 5.774e-03       | 1.697e-03             | 1.021e+03 | 3.402          | 0.000695           |
| time:TreatmentLow         | 5.586e-03       | 1.762e-03             | 1.023e+03 | 3.170          | 0.001569           |
| time:Temp24               | 1.751e-02       | 1.917e-03             | 1.045e+03 | 9.134          | < 2e-16            |
| TreatmentHigh:Temp24      | -1.079e+00      | 8.988e-01             | 1.040e+03 | -1.200         | 0.230352           |
| TreatmentLow:Temp24       | 3.590e-02       | 9.036e-01             | 1.040e+03 | 0.040          | 0.968316           |
| time:TreatmentHigh:Temp24 | 3.282e-03       | 2.643e-03             | 1.026e+03 | 1.241          | 0.214755           |
| time:TreatmentLow:Temp24  | -1.912e-04      | 2.660e-03             | 1.027e+03 | -0.072         | 0.942720           |

\* removing the non-significant interaction terms did not change the significance of the remaining terms.

**Table S2.** Summary results of the linear mixed effects model regressing growth efficiency of *Sympetrum striolatum* against temperature and predation treatments. Growth efficiency was log-transformed ( $\log[y+0.01]$ ).

|                      | <b>Estimate</b> | <b>Std. Error</b> | <b>t value</b> | <b>Pr(&gt; t )</b> |
|----------------------|-----------------|-------------------|----------------|--------------------|
| (Intercept)          | -3.0420         | 0.5501            | -5.530         | 1.64e-07           |
| TreatmentLow         | 2.2019          | 0.6943            | 3.172          | 0.00188            |
| TreatmentHigh        | 2.7307          | 0.6704            | 4.073          | 7.91e-05           |
| Temp24               | 2.9430          | 0.7665            | 3.840          | 0.00019            |
| TreatmentLow:Temp24  | -1.8282         | 0.9935            | -1.840         | 0.06796            |
| TreatmentHigh:Temp24 | -1.9908         | 0.9675            | -2.058         | 0.04157            |

\* removing the non-significant interaction term did not change the significance of the remaining terms.

**Table S3.** Summary results of the linear mixed effects model regressing food intake of *Sympetrum striolatum* against temperature and predation treatments. Food intake was log-transformed (log[y]).

|                      | <b>Estimate</b> | <b>Std. Error</b> | <b>t value</b> | <b>Pr(&gt; t )</b> |
|----------------------|-----------------|-------------------|----------------|--------------------|
| (Intercept)          | -2.12691        | 0.07210           | -29.498        | < 2e-16            |
| TreatmentLow         | -0.14433        | 0.09039           | -1.597         | 0.11101            |
| TreatmentHigh        | -0.27431        | 0.08949           | -3.065         | 0.00231            |
| Temp24               | -0.07370        | 0.10528           | -0.700         | 0.48426            |
| TreatmentLow:Temp24  | -0.35725        | 0.13974           | -2.556         | 0.01090            |
| TreatmentHigh:Temp24 | -0.24544        | 0.13523           | -1.815         | 0.07019            |

**Table S4.** Summary results of the linear mixed effects model regressing the length of the 8<sup>th</sup> (a) and 9<sup>th</sup> (b) lateral spine corrected for body size of *Sympetrum striolatum* against temperature and predation treatments. The length of lateral spines was log-transformed (log[y]).

| <b>(a) 8th spine</b> | <b>Estimate</b> | <b>Std. Error</b> | <b>t value</b> | <b>Pr(&gt; t )</b> |
|----------------------|-----------------|-------------------|----------------|--------------------|
| (Intercept)          | -3.05566        | 0.07890           | -38.727        | <2e-16             |
| TreatmentHigh        | 0.20988         | 0.11158           | 1.881          | 0.0649             |
| TreatmentLow         | 0.27013         | 0.10240           | 2.638          | 0.0106             |
| Temp24               | 0.05994         | 0.21608           | 0.277          | 0.7825             |
| TreatmentHigh:Temp24 | -0.24259        | 0.24700           | -0.982         | 0.3301             |
| TreatmentLow:Temp24  | -0.43935        | 0.24712           | -1.778         | 0.0806             |
| <b>(b) 9th spine</b> | <b>Estimate</b> | <b>Std. Error</b> | <b>t value</b> | <b>Pr(&gt; t )</b> |
| (Intercept)          | -2.37962        | 0.06678           | -35.632        | < 2e-16            |
| TreatmentHigh        | 0.12034         | 0.09445           | 1.274          | 0.20760            |
| TreatmentLow         | 0.28254         | 0.08667           | 3.260          | 0.00185            |
| Temp24               | 0.08445         | 0.18289           | 0.462          | 0.64597            |
| TreatmentHigh:Temp24 | -0.22818        | 0.20906           | -1.091         | 0.27952            |
| TreatmentLow:Temp24  | -0.37349        | 0.20916           | -1.786         | 0.07930            |
